# Supplementary material for: Identification of Small GTPases That Phosphorylate IRF3 through TBK1 Activation Using an Active Mutant Library Screen
Source: PubMed Central journal article supplement — Biomol Ther (Seoul). 2023 Jan 1;31(1):48–58. doi: 10.4062/biomolther.2022.119 (PMC9810446; doi:10.4062/biomolther.2022.119), 2023-01-01
Supplement: bt-31-1-48-supple.pdf [file bt-31-1-48-supple.pdf]

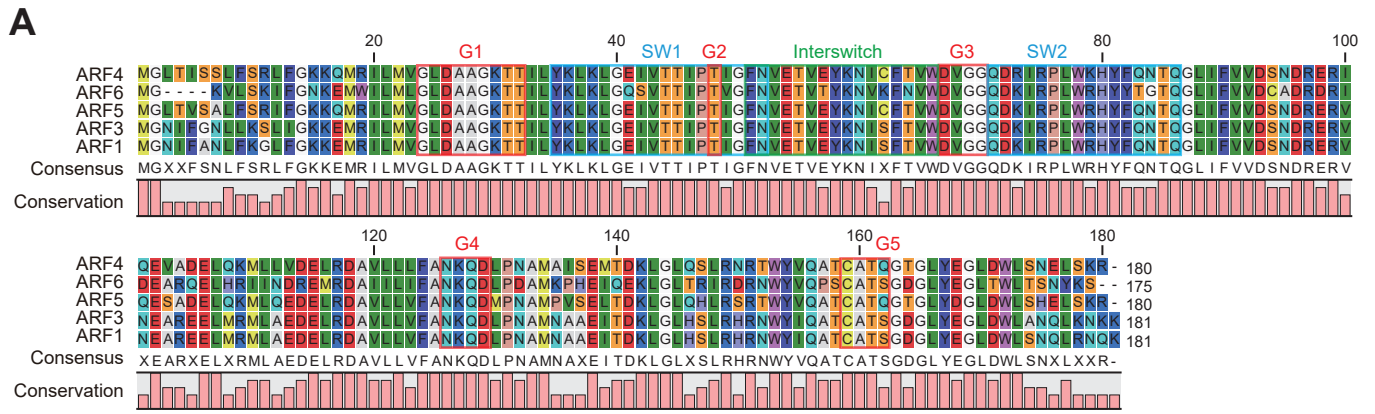

**B**

|              |      | Similarity (%) |      |      |      |      |
|--------------|------|----------------|------|------|------|------|
|              |      | ARF4           | ARF6 | ARF5 | ARF3 | ARF1 |
| Identity (%) | ARF4 |                | 72.9 | 93.9 | 83.4 | 84.5 |
|              | ARF6 | 63.0           |      | 74.6 | 76.8 | 77.3 |
|              | ARF5 | 90.1           | 63.0 |      | 82.9 | 84.0 |
|              | ARF3 | 78.5           | 66.9 | 78.5 |      | 96.7 |
|              | ARF1 | 80.1           | 66.3 | 80.1 | 96.7 |      |

**Supplementary Figure 1.** Sequence comparison of ARF4 with ARF1/3/5/6

(A) Alignment of amino acid sequences for ARF4 with other Arf GTPases that positively regulate IRF3 phosphorylation. Common domain structure of Arf GTPases is shown above.

(B) Protein sequence identity among Arf GTPases that increase phosphorylation of IRF3 including ARF4. Identity, percentage of identical residues; similarities, percentage of similar functional residues.
